# Supplementary material
Source: PubMed Central journal article supplement (PMC5877826)
Supplement: NIHMS928249-supplement-2.pdf [file NIHMS928249-supplement-2.pdf]

| Spearman correlation:                      | <i>C. elegans</i> |                     | <i>S. cerevisiae</i> |                     | Mouse NIH3T3 |                     | Drosophila S2 |                     |
|--------------------------------------------|-------------------|---------------------|----------------------|---------------------|--------------|---------------------|---------------|---------------------|
|                                            | R                 | P                   | R                    | P                   | R            | P                   | R             | P                   |
| Poly(A) vs abundance                       | -0.24             | <10 <sup>-174</sup> | -0.24                | <10 <sup>-57</sup>  | -0.27        | <10 <sup>-53</sup>  | -0.05         | <10 <sup>-3</sup>   |
| Poly(A) vs F <sub>op</sub> (or TR)         | -0.32             | <10 <sup>-250</sup> | -0.17                | <10 <sup>-25</sup>  | -0.19        | <10 <sup>-31</sup>  | -0.09         | <10 <sup>-10</sup>  |
| Poly(A) vs RE                              | -0.29             | <10 <sup>-16</sup>  | -0.09                | <10 <sup>-8</sup>   | -0.08        | <10 <sup>-6</sup>   |               |                     |
| Poly(A) vs ORF                             | 0.30              | <10 <sup>-258</sup> |                      |                     |              |                     |               |                     |
| Poly(A) vs 3'UTR                           | 0.21              | <10 <sup>-114</sup> |                      |                     |              |                     |               |                     |
| Poly(A) vs half-life                       |                   |                     | -0.11                | <10 <sup>-9</sup>   | -0.14        | <10 <sup>-16</sup>  |               |                     |
| Poly(A) vs CPI                             |                   |                     | 0.2                  | <10 <sup>-29</sup>  |              |                     |               |                     |
| F <sub>op</sub> (or TR) vs abundance       | 0.37              | <10 <sup>-250</sup> | 0.7                  | <10 <sup>-250</sup> | 0.45         | <10 <sup>-162</sup> | 0.37          | <10 <sup>-163</sup> |
| F <sub>op</sub> (or TR) vs half-life       |                   |                     | 0.28                 | <10 <sup>-51</sup>  | 0.2          | <10 <sup>-33</sup>  |               |                     |
| F <sub>op</sub> (or TR) vs RE              | 0.41              | <10 <sup>-16</sup>  | 0.47                 | <10 <sup>-187</sup> | 0.44         | <10 <sup>-153</sup> |               |                     |
| Abundance measured by mTail-seq vs RNA-seq | 0.84              | <10 <sup>-16</sup>  |                      |                     |              |                     |               |                     |

**Supplementary Table 1.** Spearman correlation values for poly(A) tail length, frequency of optimal codons (F<sub>op</sub>) or NIH3T3 translation rates (TR), abundance, ribosome enrichment (RE), open reading frame (ORF) length, 3' untranslated region (3'UTR) length, codon protection index (CPI), and other features in *C. elegans*, *S. cerevisiae*, *M. musculus* NIH3T3 and Drosophila S2 cells. Source data for *C. elegans* calculations are online and in **Supplementary Data Sets 1, 2 and 3**; references and details for the source data used for calculations in other species are in **Supplementary Table 2**.
